# Supplementary material
Source: publisher site journal article supplement (https://kjim.org/upload/media/kjim-2023-542-Supplementary-Fig-1.pdf)
Supplement: Supplementary file 1 [file kjim-2023-542-Supplementary-Fig-1.pdf]

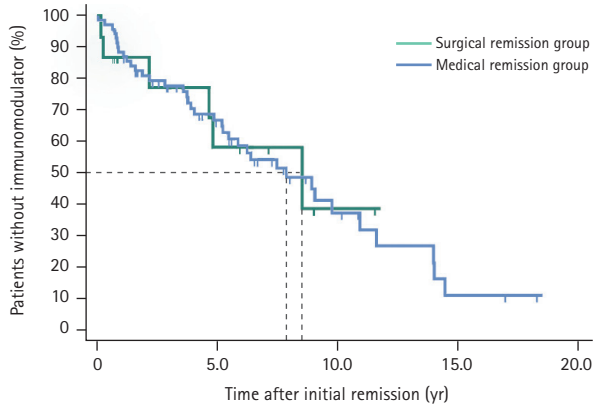

**A**

| Number at risk           |  | 0  | 5.0 | 8.5 | 10.0 | 15.0 | 20.0 |
|--------------------------|--|----|-----|-----|------|------|------|
| Medical remission group  |  | 73 | 34  | 8   | 2    | 0    |      |
| Surgical remission group |  | 15 | 6   | 1   | 0    | 0    |      |

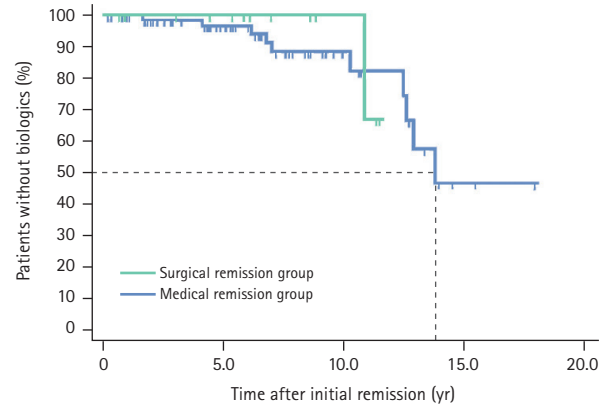

**B**

| Number at risk           |  | 0  | 5.0 | 10.0 | 13.5 | 15.0 | 20.0 |
|--------------------------|--|----|-----|------|------|------|------|
| Medical remission group  |  | 73 | 44  | 14   | 2    | 0    |      |
| Surgical remission group |  | 15 | 9   | 3    | 0    | 0    |      |

**Supplementary Figure 1.** Cumulative probability of a post-remission course free from immunomodulator use (A) and biologics use (B).
